# Supplementary material for: Recurrent mutations, including NPM1c, activate a BRD4-dependent core transcriptional program in acute myeloid leukemia
Source: PubMed Central journal article supplement (PMC3918873; doi:10.1038/leu.2013.338), 2013-12-13

# Supplementary Figure 1

Composite mouse blood concentrations of IBET151 in NSG mice after 15 mg/kg intra-peritoneal dosing

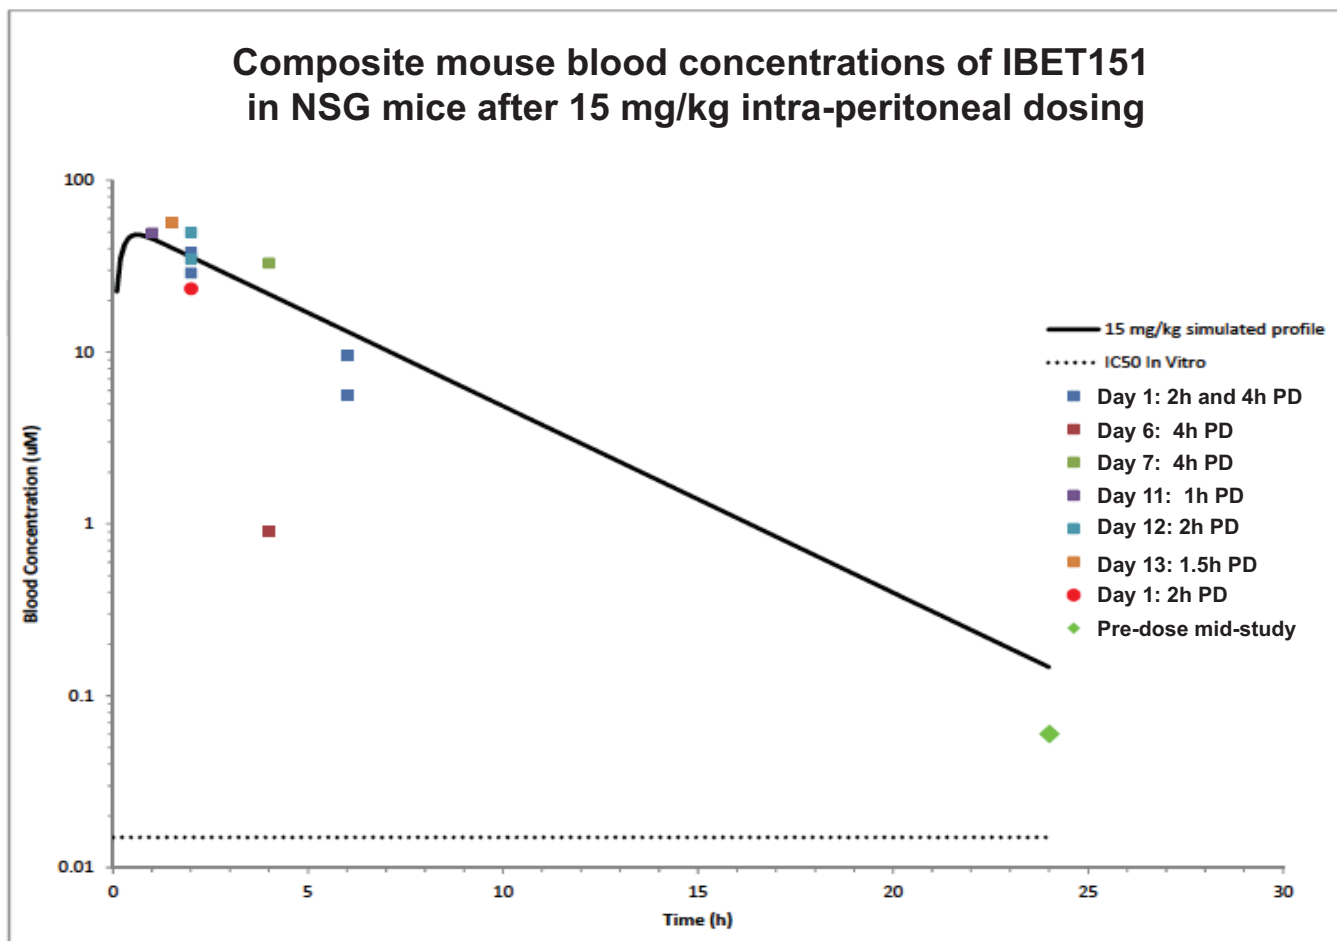

# Supplementary Figure 2

**A**

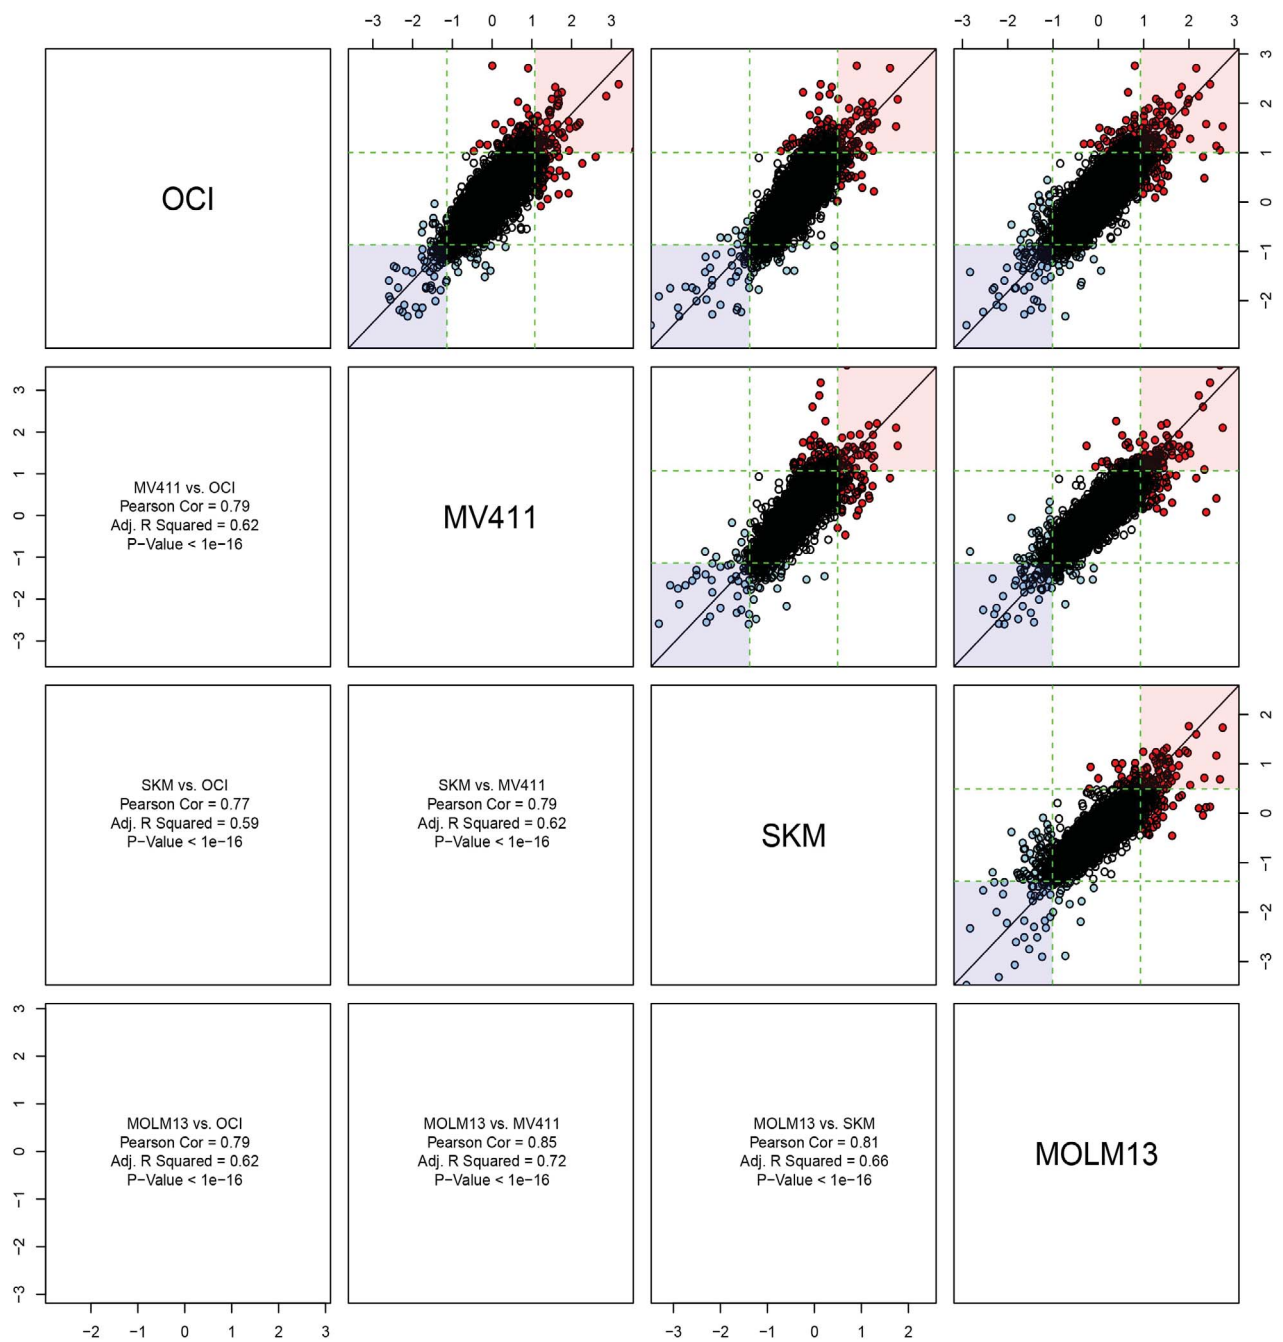

**B**

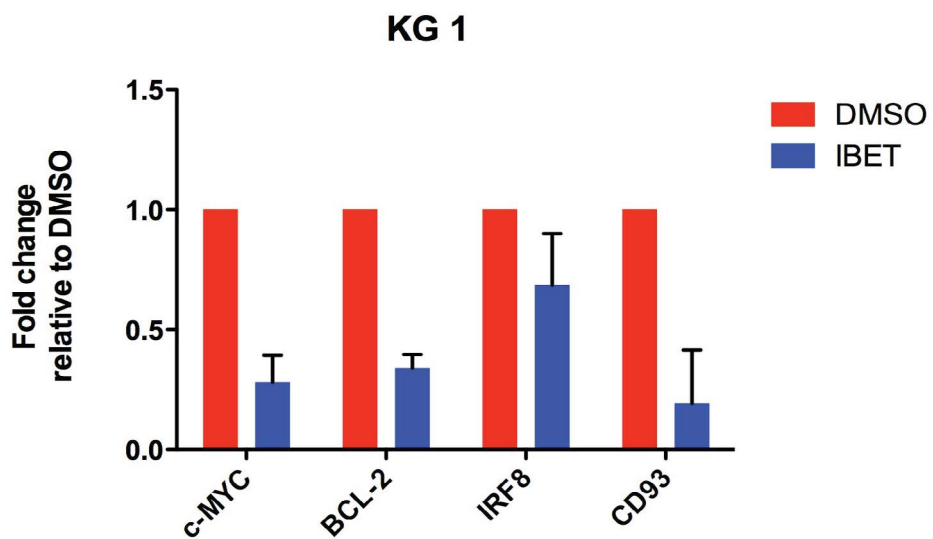

# Supplementary Figure 3

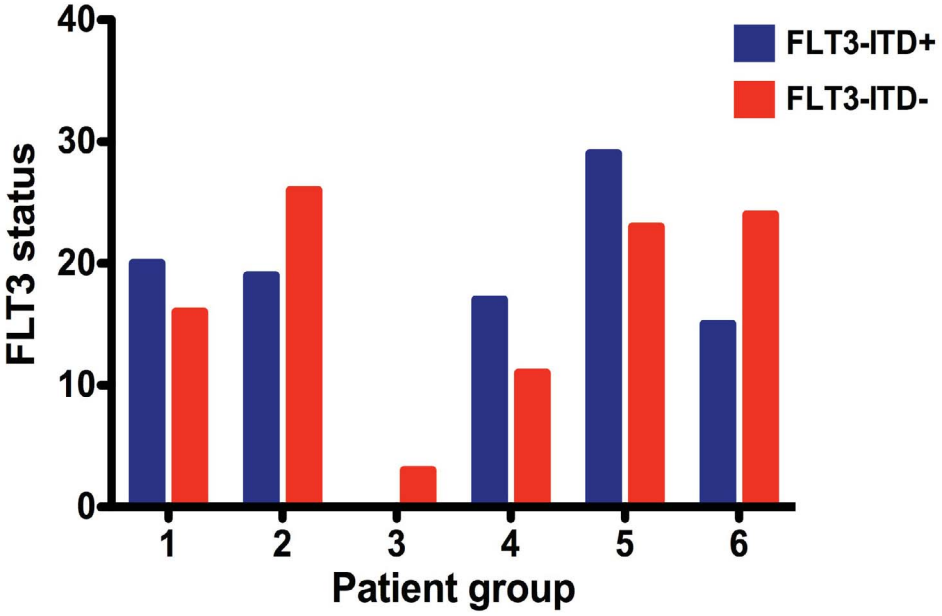

Supplementary Figure 4

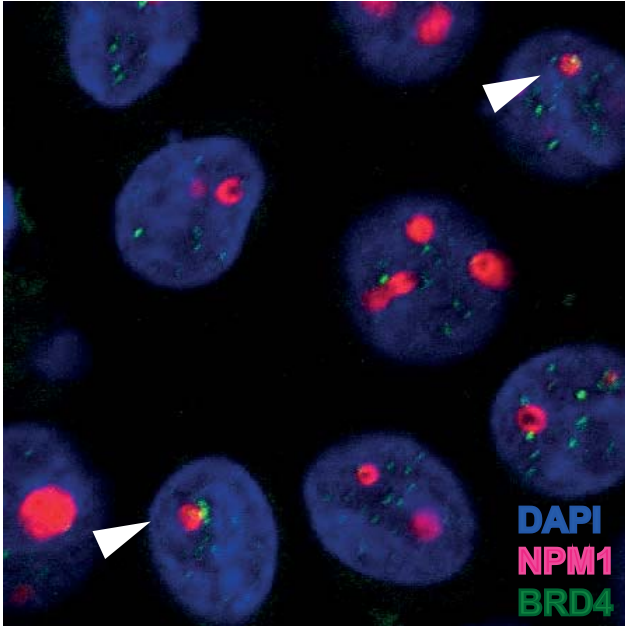

# Supplementary Figure 5

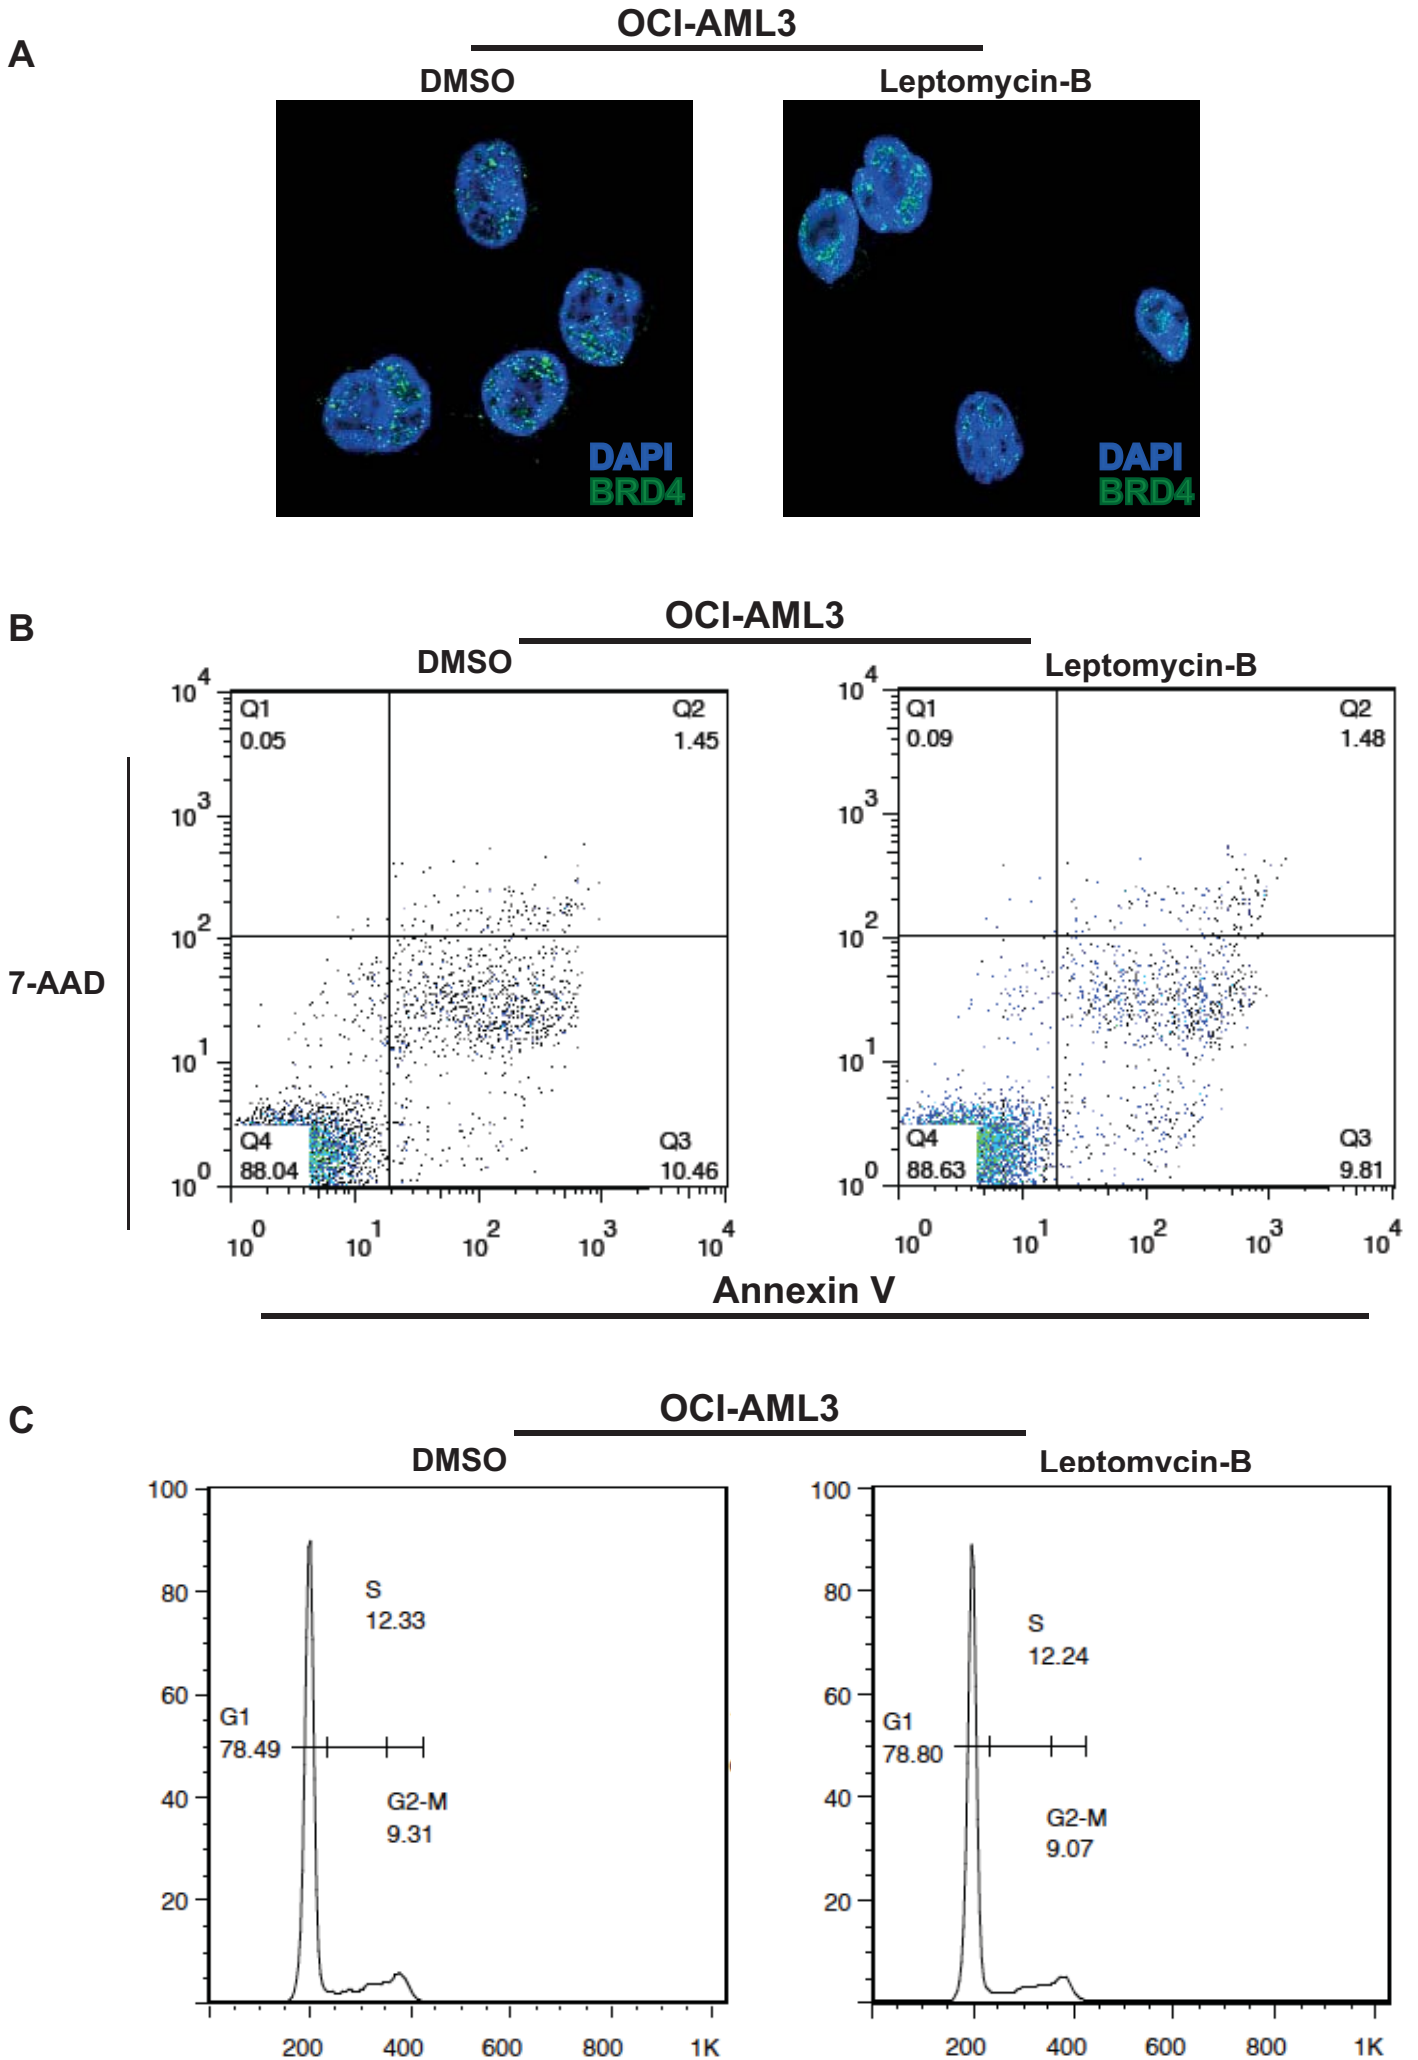

# Supplementary Figure 6

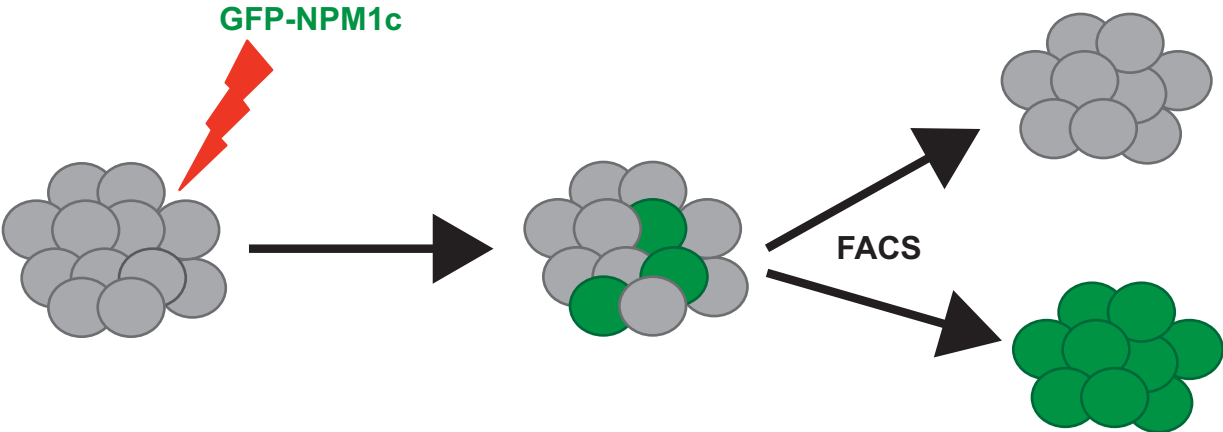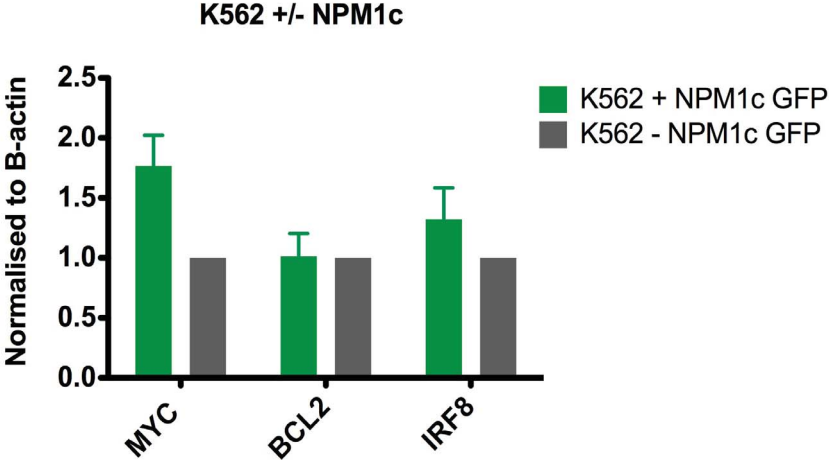

Supplement: leu2013338x1.pdf [file leu2013338x1.pdf]
