# Supplementary material for: Recurrent mutations, including NPM1c, activate a BRD4-dependent core transcriptional program in acute myeloid leukemia
Source: PubMed Central journal article supplement (PMC3918873; doi:10.1038/leu.2013.338), 2013-12-13
Supplement: leu2013338x2.pdf [file leu2013338x2.pdf]

| Patient | Sex | Age | Karyotype            | NPM1 status | FLT3 status | Fig 1 plating | Fig 1 Annexin | Fig 2 Gene Exp | Fig 4 plating |
|---------|-----|-----|----------------------|-------------|-------------|---------------|---------------|----------------|---------------|
| PT1     | M   | 80  | Normal               | WT          | WT          | N             | Y             | Y              | N             |
| PT-2    | M   | 50  | t(15;17)             | WT          | WT          | N             | N             | Y              | N             |
| PT-3    | M   | 47  | Normal               | NPM1c       | TKD         | N             | Y             | Y              | N             |
| PT-4    | F   | 79  | i17(q)               | WT          | WT          | N             | Y             | Y              | N             |
| PT-5    | M   | 15  | Normal               | WT          | WT          | N             | N             | Y              | N             |
| PT-6    | M   | 70  | Normal               | NPM1c       | WT          | N             | Y             | Y              | Y             |
| PT-7    | F   | 71  | Normal               | WT          | WT          | Y             | N             | N              | N             |
| PT-8    | M   | 79  | Ab Ch3(q26?) +marker | WT          | ITD         | Y             | N             | N              | N             |
| PT-9    | M   | 50  | t(15;17)             | WT          | ITD         | Y             | N             | N              | N             |
| PT-10   | M   | 56  | t(3;7)               | WT          | WT          | Y             | N             | N              | N             |
| PT-11   | F   | 63  | N/A                  | WT          | ITD         | Y             | N             | N              | N             |
| PT-12   | M   | 71  | Normal               | N/A         | WT          | Y             | N             | N              | N             |
| PT-13   | F   | 68  | Add 11(p15)          | NPM1c       | WT          | N             | Y             | N              | N             |
| PT-14   | M   |     | Normal               | NPM1c       | ITD         | N             | N             | N              | Y             |
| PT-15   | F   | 56  | Normal               | NPM1c       | ITD         | N             | N             | N              | Y             |
| PT-16   | M   | 47  | Normal               | NPM1c       | ITD         | N             | N             | N              | Y             |
| PT-17   | F   | 80  | U                    | NPM1c       | ITD         | N             | N             | N              | Y             |

Supplementary Table 1. Details of the seventeen primary human AML samples used in this study

## Supplementary Table 2

### Genes within the core signature

ANKRD41  
BCL2  
C12orf24  
CACNA2D3  
CCDC86  
CSF1R  
FAM136A  
FLJ39827  
IRF8  
LAT2  
LOC728492  
LRRC33  
MLKL  
MS4A6A  
MYBPH  
MYC  
NOP16,HSPC111  
PHF15  
PLD6  
RRS1  
SLA  
SLC2A5  
TIGD5  
TNS3  
TRIP6  
TSEN2

| Date of transplant | Unique ID   | Tumour   | Date/type of treatment | Date death | Survival post Transp (days) | Survival post Rx (days) | Reason for culling  |
|--------------------|-------------|----------|------------------------|------------|-----------------------------|-------------------------|---------------------|
| 05/04/12           | 196661 1L   | Tumour 1 | 16/04/12 I-BET         | 30/04/12   | 25                          | 14                      | Weight loss > 20%   |
| 05/04/12           | 196661 1R   | Tumour 1 | 16/04/12 I-BET         | 01/05/12   | 26                          | 15                      | Weight loss > 20%   |
| 05/04/12           | 196661 NM   | Tumour 1 | 16/04/12 I-BET         | 04/05/12   | 29                          | 18                      | Weight loss > 20%   |
| 05/04/12           | 196661 1L1R | Tumour 1 | 16/04/12 I-BET         | 03/05/12   | 28                          | 17                      | Weight loss > 20%   |
| 05/04/12           | 197887 2L   | Tumour 1 | 16/04/12 Vehicle       | 26/04/12   | 21                          | 10                      | Hind limb paralysis |
| 05/04/12           | 197887 2R   | Tumour 1 | 16/04/12 Vehicle       | 01/05/12   | 26                          | 15                      | Weight loss > 20%   |
| 05/04/12           | 197887 1L   | Tumour 1 | 16/04/12 Vehicle       | 30/04/12   | 25                          | 14                      | Weight loss > 20%   |
| 05/04/12           | 197887 1R   | Tumour 1 | 16/04/12 Vehicle       | 01/05/12   | 26                          | 15                      | Hind limb paralysis |
| 05/04/12           | 196660 2L   | Tumour 2 | 16/04/12 I-BET         | 27/04/12   | 22                          | 11                      | Weight loss > 20%   |
| 05/04/12           | 196660 2R   | Tumour 2 | 16/04/12 I-BET         | 27/04/12   | 22                          | 11                      | Weight loss > 20%   |
| 05/04/12           | 196660 NM   | Tumour 2 | 16/04/12 I-BET         | 26/04/12   | 21                          | 10                      | Weight loss > 20%   |
| 05/04/12           | 196660 1L1R | Tumour 2 | 16/04/12 I-BET         | 27/04/12   | 22                          | 11                      | Weight loss > 20%   |
| 05/04/12           | 196662 2L   | Tumour 2 | 16/04/12 Vehicle       | 23/04/12   | 18                          | 7                       | Weight loss > 20%   |
| 05/04/12           | 196662 2R   | Tumour 2 | 16/04/12 Vehicle       | 24/04/12   | 19                          | 8                       | Weight loss > 20%   |
| 05/04/12           | 196662 NM   | Tumour 2 | 16/04/12 Vehicle       | 24/04/12   | 19                          | 8                       | Weight loss > 20%   |
| 05/04/12           | 196662 1L1R | Tumour 2 | 16/04/12 Vehicle       | 23/04/12   | 18                          | 7                       | Weight loss > 20%   |
| 05/04/12           | 196663 1L   | Tumour 3 | 16/04/12 I-BET         | 02/05/12   | 27                          | 16                      | Weight loss > 20%   |
| 05/04/12           | 196663 1R   | Tumour 3 | 16/04/12 I-BET         | 03/05/12   | 28                          | 17                      | Weight loss > 20%   |
| 05/04/12           | 196663 NM   | Tumour 3 | 16/04/12 I-BET         | 03/05/12   | 28                          | 17                      | Weight loss > 20%   |
| 05/04/12           | 196663 1L1R | Tumour 3 | 16/04/12 I-BET         | 06/05/12   | 31                          | 20                      | Weight loss > 20%   |
| 05/04/12           | 197888 1L   | Tumour 3 | 16/04/12 Vehicle       | 30/04/12   | 25                          | 14                      | Hind limb paralysis |
| 05/04/12           | 197888 1R   | Tumour 3 | 16/04/12 Vehicle       | 30/04/12   | 25                          | 14                      | Weight loss > 20%   |
| 05/04/12           | 197888 2L   | Tumour 3 | 16/04/12 Vehicle       | 30/04/12   | 25                          | 14                      | Hind limb paralysis |
| 05/04/12           | 197888 2R   | Tumour 3 | 16/04/12 Vehicle       | 30/04/12   | 25                          | 14                      | Weight loss > 20%   |

**Supplementary Table 3. Life tables for transplanted mice.** Treated mice are highlighted in blue, non-treated vehicle controls have no highlighting.

| <b>NPM1c murine tumour</b> | <b>Common integration sites</b>                                                         |
|----------------------------|-----------------------------------------------------------------------------------------|
| <b>Tumour 1</b>            | E2f8<br>RP23-106P7.2<br>Aldh1l1<br>Ch11:54083069: intergenic<br>Ch8:83417895:intergenic |
| <b>Tumour 2</b>            | lqgap2<br>CSF2<br>Ch7:152239044:intergenic<br>Ch16:42681266: intergenic                 |
| <b>Tumour 3</b>            | Flt3<br>Ptpn1<br>Cux1<br>Pilcam<br>Tnks<br>Nf1                                          |

**Supplementary Table 4. Cooperating mutations in separate murine NPM1c murine models**
